# Supplementary material
Source: PubMed Central journal article supplement (PMC3149899)

**Supplemental Digital Content:**

Supplemental Digital Content 1. Figure that demonstrates the design of the Rotavirus Study. \*1 child was co-infected with Rotavirus and Cryptosporidia .tif

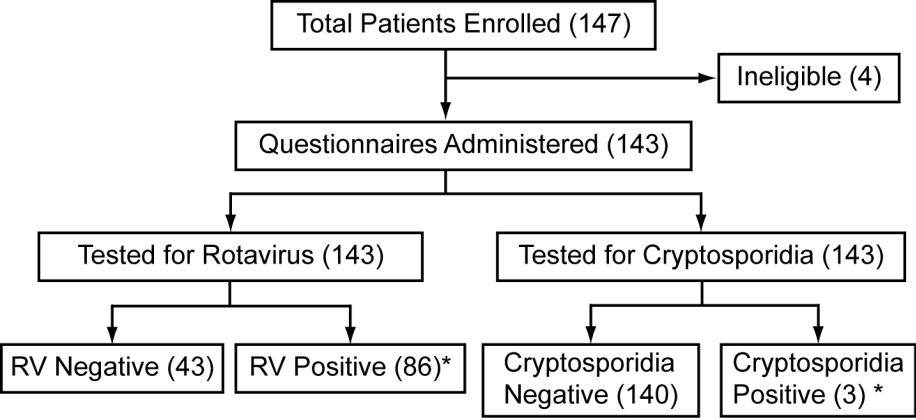

Supplement: NIHMS303098-supplement-01.pdf [file NIHMS303098-supplement-01.pdf]
